# Supplementary material for: Biological Control May Fail on Pests Applied with High Doses of Insecticides: Effects of Sub-Lethal Concentrations of a Pyrethroid on the Host-Searching Behavior of the Aphid Parasitoid Aphidius colemani (Hymenoptera, Braconidae) on Aphid Pests
Source: MDPI journal article supplement (doi:10.3390/agriculture11060539), 2021-06-11
Supplement: s1 [file s1]

**Table S1.** Generalized linear mixed models (GLMM) showing the full model evaluated for each behavior observed in *Aphidius colemani* (Ac) individuals exposed and unexposed to LC20 of lambda-cyhalothrin (Ac condition: AcC) and faced with susceptible and kdr-resistant *M. persicae* genotypes (MpG), exposed and unexposed to their respective LC20 of lambda-cyhalothrin (Zero 5 EC) (Mp condition: MpC). For each level, the Chi-square statistical test ( $\chi^2$ ), the degrees of freedom (df), and the *p*-value are represented.

| Mobility                        |                  |          |                      |          |                   |          |                     |          |
|---------------------------------|------------------|----------|----------------------|----------|-------------------|----------|---------------------|----------|
|                                 | Walking in       |          | Walking out          |          | Resting           |          |                     |          |
|                                 | $\chi^2$ (df)    | <i>p</i> | $\chi^2$ (df)        | <i>p</i> | $\chi^2$ (df)     | <i>p</i> | $\chi^2$ (df)       | <i>p</i> |
| Ac Condition (AcC)              | 0.01 (1)         | 0.934    | 1.92 (1)             | 0.165    | 0.08 (1)          | 0.778    | --                  | --       |
| Mp Genotype (MpG)               | 2.73 (1)         | 0.098    | 7.49 (1)             | 0.01     | 1.88 (1)          | 0.171    | --                  | --       |
| Mp Condition (MpC)              | 2063.23 (2)      | <0.0001  | 1435.9 (2)           | <0.0001  | 16.52 (2)         | <0.0001  | --                  | --       |
| AcC x MpG                       | 0.08 (1)         | 0.765    | 0.54 (1)             | 0.462    | 2.40 (1)          | 0.122    | --                  | --       |
| AcC x MpC                       | 0.54 (2)         | 0.763    | 1.33 (2)             | 0.514    | 2.15 (2)          | 0.341    | --                  | --       |
| MpG x MpC                       | 0.17 (1)         | 0.683    | 0.40 (1)             | 0.528    | 1.93 (1)          | 0.164    | --                  | --       |
| AcC x MpG x MpC                 | 0.00 (1)         | 0.975    | 0.01 (1)             | 0.911    | 0.05 (1)          | 0.812    | --                  | --       |
| Antennal movements and grooming |                  |          |                      |          |                   |          |                     |          |
|                                 | Antennal contact |          | Antennal examination |          | Antennal grooming |          | Ovipositor grooming |          |
|                                 | $\chi^2$ (df)    | <i>p</i> | $\chi^2$ (df)        | <i>p</i> | $\chi^2$ (df)     | <i>p</i> | $\chi^2$ (df)       | <i>p</i> |
| Ac Condition (AcC)              | 0.55 (1)         | 0.456    | 2.87 (1)             | 0.090    | 17.74 (1)         | <0.0001  | 0.33 (1)            | 0.563    |
| Mp Genotype (MpG)               | 1.02 (1)         | 0.312    | 0.15 (1)             | 0.694    | 5.48 (1)          | 0.019    | 15.13 (1)           | <0.0001  |
| Mp Condition (MpC)              | 587.57 (2)       | <0.0001  | 146.18 (2)           | <0.0001  | 1454.44 (2)       | <0.0001  | 600.08 (2)          | <0.0001  |
| AcC x MpG                       | 3.95 (1)         | 0.047    | 0.03 (1)             | 0.870    | 0.02 (1)          | 0.888    | 4.29 (1)            | 0.083    |
| AcC x MpC                       | 6.32 (2)         | 0.042    | 1.68 (2)             | 0.431    | 0.10 (2)          | 0.951    | 3.00 (2)            | 0.223    |
| MpG x MpC                       | 1.78 (1)         | 0.181    | 1.72 (1)             | 0.188    | 2.27 (1)          | 0.131    | 0.70 (1)            | 0.401    |
| AcC x MpG x MpC                 | 0.23 (1)         | 0.631    | 0.69 (1)             | 0.403    | 0.80 (1)          | 0.368    | 0.81 (1)            | 0.366    |
| Oviposition behavior            |                  |          |                      |          |                   |          |                     |          |
|                                 | Sting-attempt    |          | Sting                |          | Sting-attempt out |          | Sting out           |          |
|                                 | $\chi^2$ (df)    | <i>p</i> | $\chi^2$ (df)        | <i>p</i> | $\chi^2$ (df)     | <i>p</i> | $\chi^2$ (df)       | <i>p</i> |
| Ac Condition (AcC)              | 1.27 (1)         | 0.258    | 2.65 (1)             | 0.103    | 5.88 (1)          | 0.015    | 4.12 (1)            | 0.042    |
| Mp Genotype (MpG)               | 5.94 (1)         | 0.015    | 11.18 (1)            | <0.0001  | 0.04 (1)          | 0.851    | 0.12 (1)            | 0.719    |
| Mp Condition (MpC)              | 78.31 (2)        | <0.0001  | 66.31 (2)            | <0.0001  | 56.79 (2)         | <0.0001  | 47.50 (2)           | <0.0001  |
| AcC x MpG                       | 0.00 (1)         | 0.988    | 0.04 (1)             | 0.833    | 0.14 (1)          | 0.704    | 1.15 (1)            | 0.282    |
| AcC x MpC                       | 0.21 (2)         | 0.899    | 0.21 (2)             | 0.900    | 4.41 (2)          | 0.110    | 8.68 (2)            | 0.013    |
| MpG x MpC                       | 0.00 (1)         | 0.969    | 1.84 (1)             | 0.174    | 3.70 (1)          | 0.054    | 0.00 (1)            | 0.995    |
| AcC x MpG x MpC                 | 0.01 (1)         | 0.912    | 0.01 (1)             | 0.917    | 0.28 (1)          | 0.595    | 0.06 (1)            | 0.941    |
